# Supplementary material for: Evaluating the impact of blowing snow sea salt aerosol on springtime BrO and O 3 in the Arctic
Source: Copernicus journal article supplement (doi:10.5194/acp-2019-1094), 2020-01-30
Supplement: Supplementary file 1 [file acp-2019-1094-supplement.pdf]

## Supplementary Information for

### Evaluating the impact of blowing snow sea salt aerosol on Arctic springtime BrO and O<sub>3</sub> in the Arctic

5 Jiayue Huang, Lyatt Jaeglé, Qianjie Chen, Becky Alexander, Tomas Sherwen, Mat J. Evans, Nicolas Theys, and Sungeon Choi

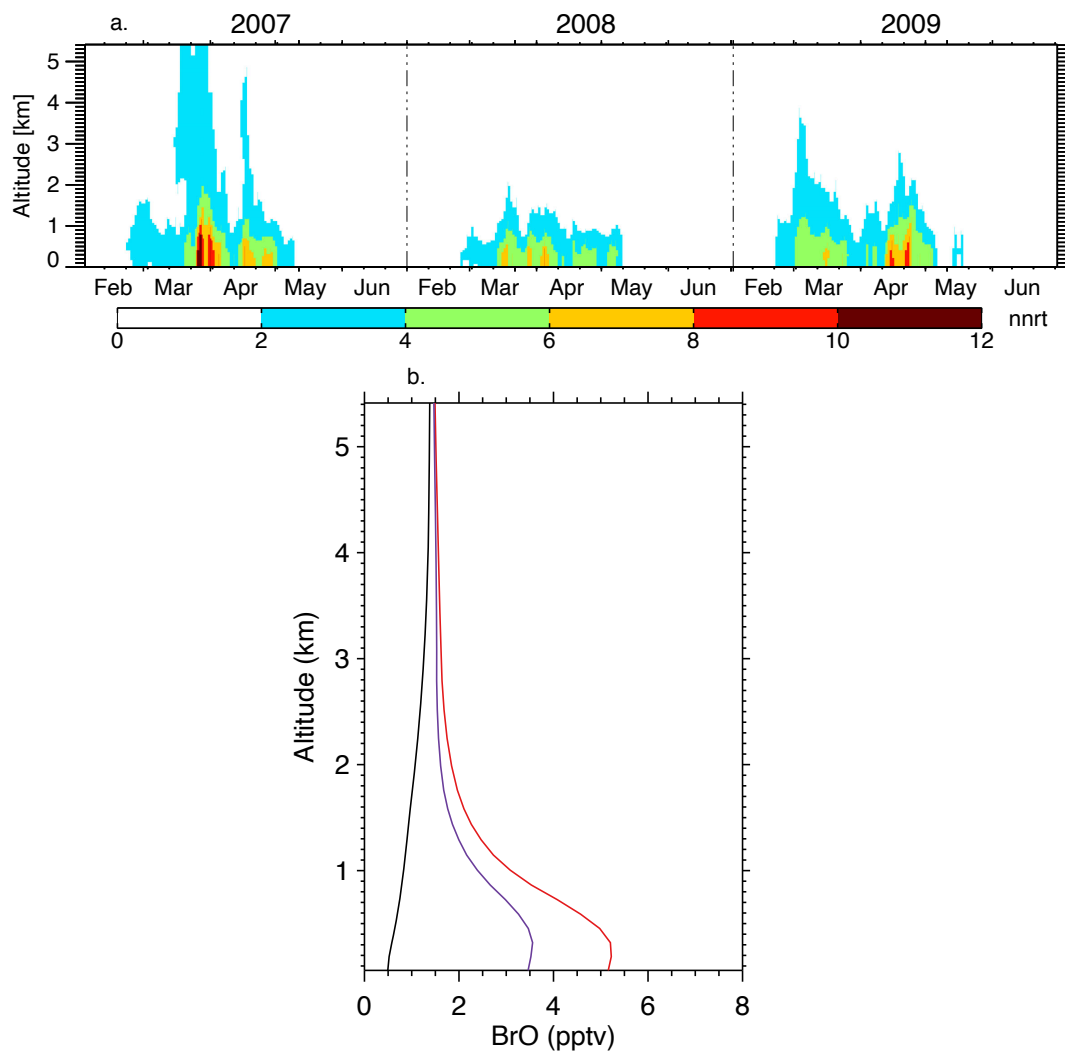

10 **Figure S1: (a) Timeseries of daily BrO mixing ratio (in pptv) averaged poleward of 60° N in the GEOS-Chem FYI+MYI Snow simulation between February and June for 2007–2009. Note that the model is sampled between 9 and 11 am local time. (b) Mean vertical profile of BrO (9–11 am local time) averaged poleward of 60° N for March and April 2007–2009 in the STD simulation (black line), FYI Snow simulation (purple), and FYI+MYI simulation (red).**

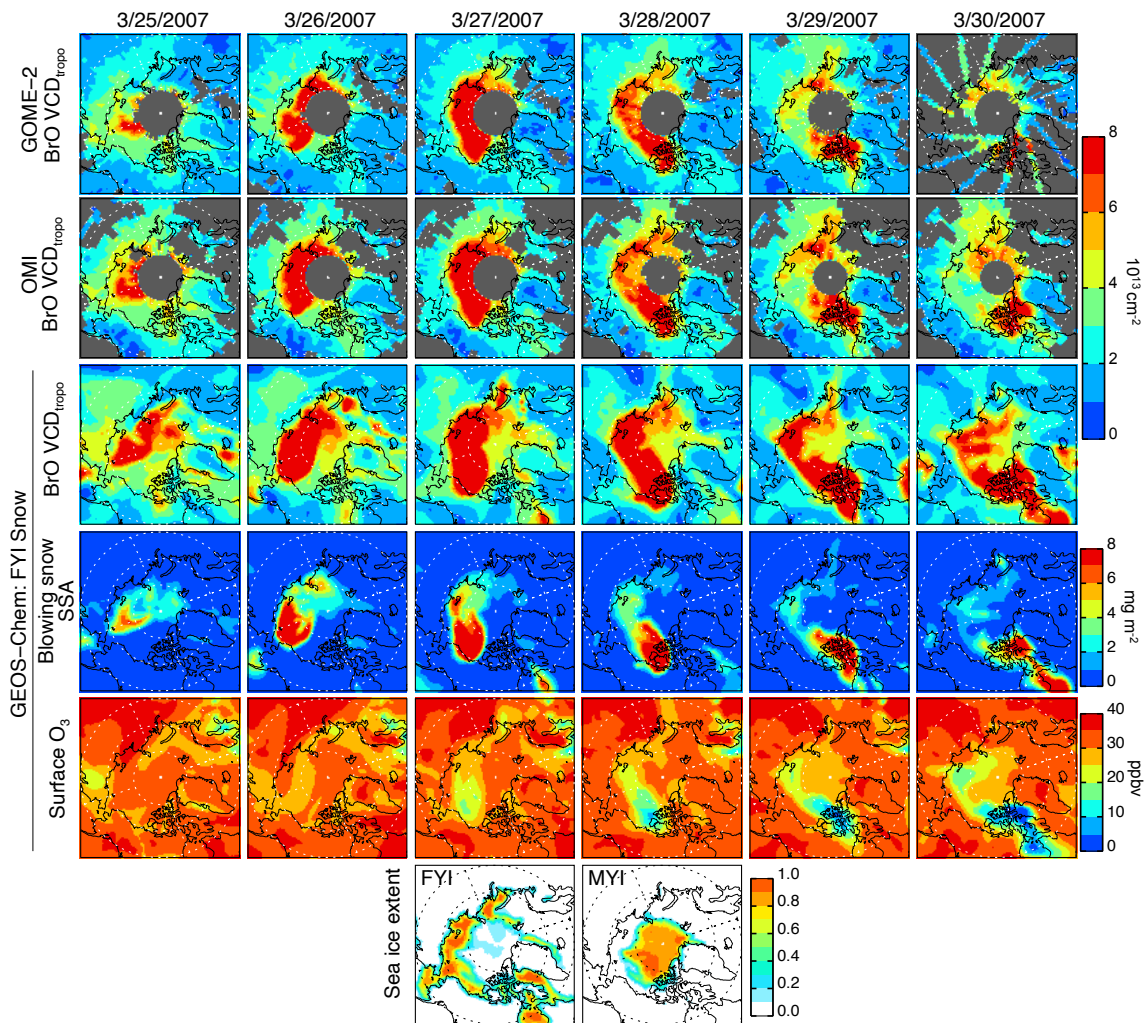

15 Figure S2: Same as Figure 5, but showing the results of the GEOS-Chem FYI Snow simulation for 25-30 March 2007.
